# Supplementary material for: Production of γ-valerolactone via selective catalytic conversion of hemicellulose in pubescens without addition of external hydrogen
Source: Royal Society of Chemistry journal article supplement (doi:10.1039/c5gc01775k), 2015-09-16
Supplement: c5gc01775k1.pdf [file c5gc01775k1.pdf]

## Supplementary Information for Production of $\gamma$ -valerolactone via Selective Catalytic Conversion of Hemicellulose in *Pubescens* without Addition of External Hydrogen †

Received 00th January 20xx,  
Accepted 00th January 20xx

DOI: 10.1039/x0xx00000x

www.rsc.org/

Yiping Luo<sup>a</sup>, Jian Yi<sup>a</sup>, Dongmei Tong<sup>a</sup>, and Changwei Hu<sup>a\*</sup>

<sup>a</sup> Key Laboratory of Green Chemistry and Technology, Ministry of Education, College of Chemistry, Sichuan University, Chengdu, Sichuan, 610064, China.

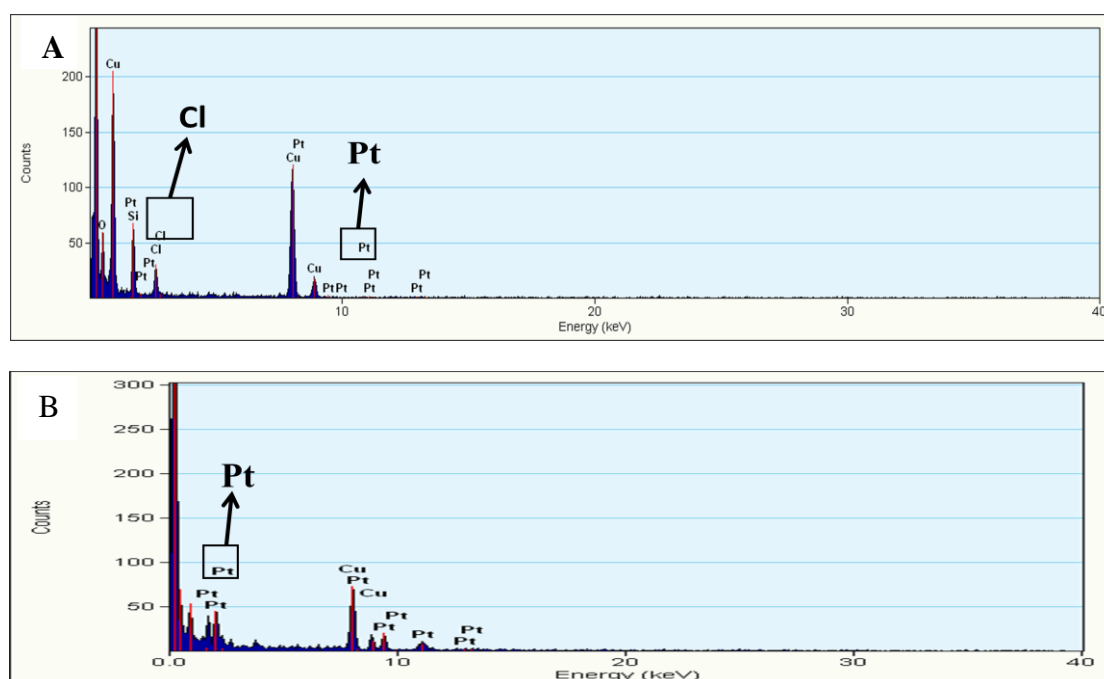

**Figure S1** EDX spectra of samples with different treatment: A: UC-5Pt/C catalyst; B: 5Pt/C catalyst

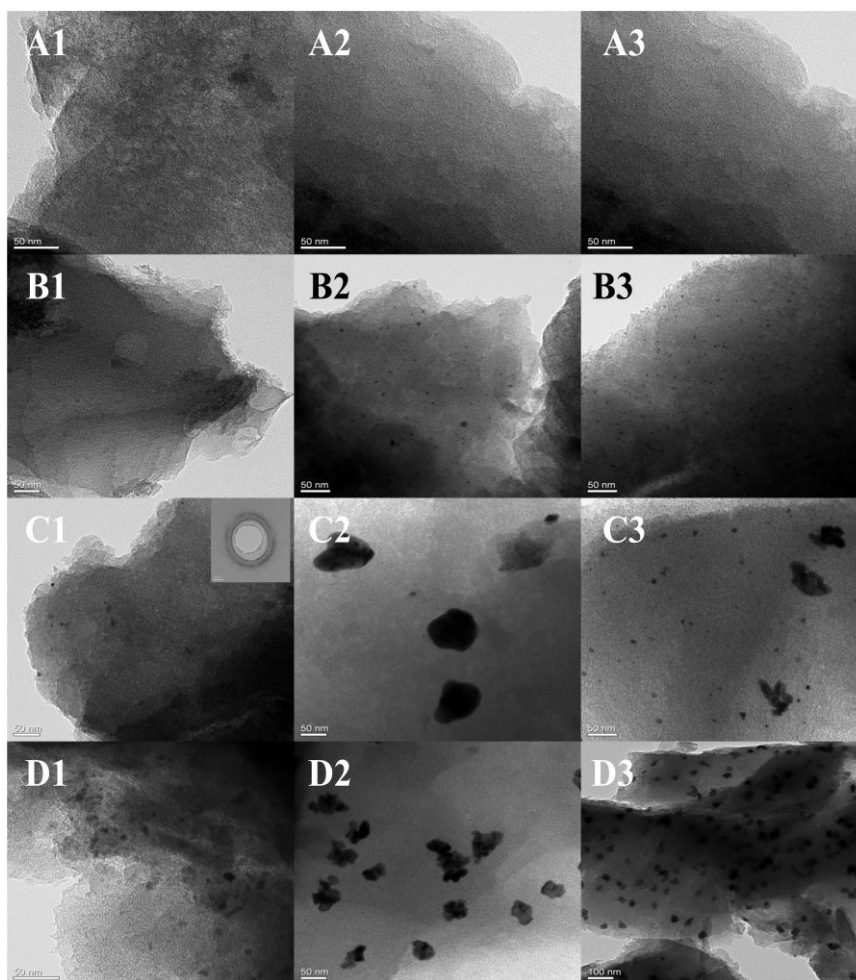

**Figure S2** TEM micrographs of different Pt loaded samples with different treatment: A1: UC-0.5Pt/C; A2: UR-0.5Pt/C; A3: 0.5Pt/C; B1: UC-3Pt/C; B2: UR-3Pt/C; B3: 3Pt/C; C1: UC-7Pt/C; C2: UR-7Pt/C; C3: 7Pt/C; D1: UC-11Pt/C; D2: UR-11Pt/C; D3: 11Pt/C;

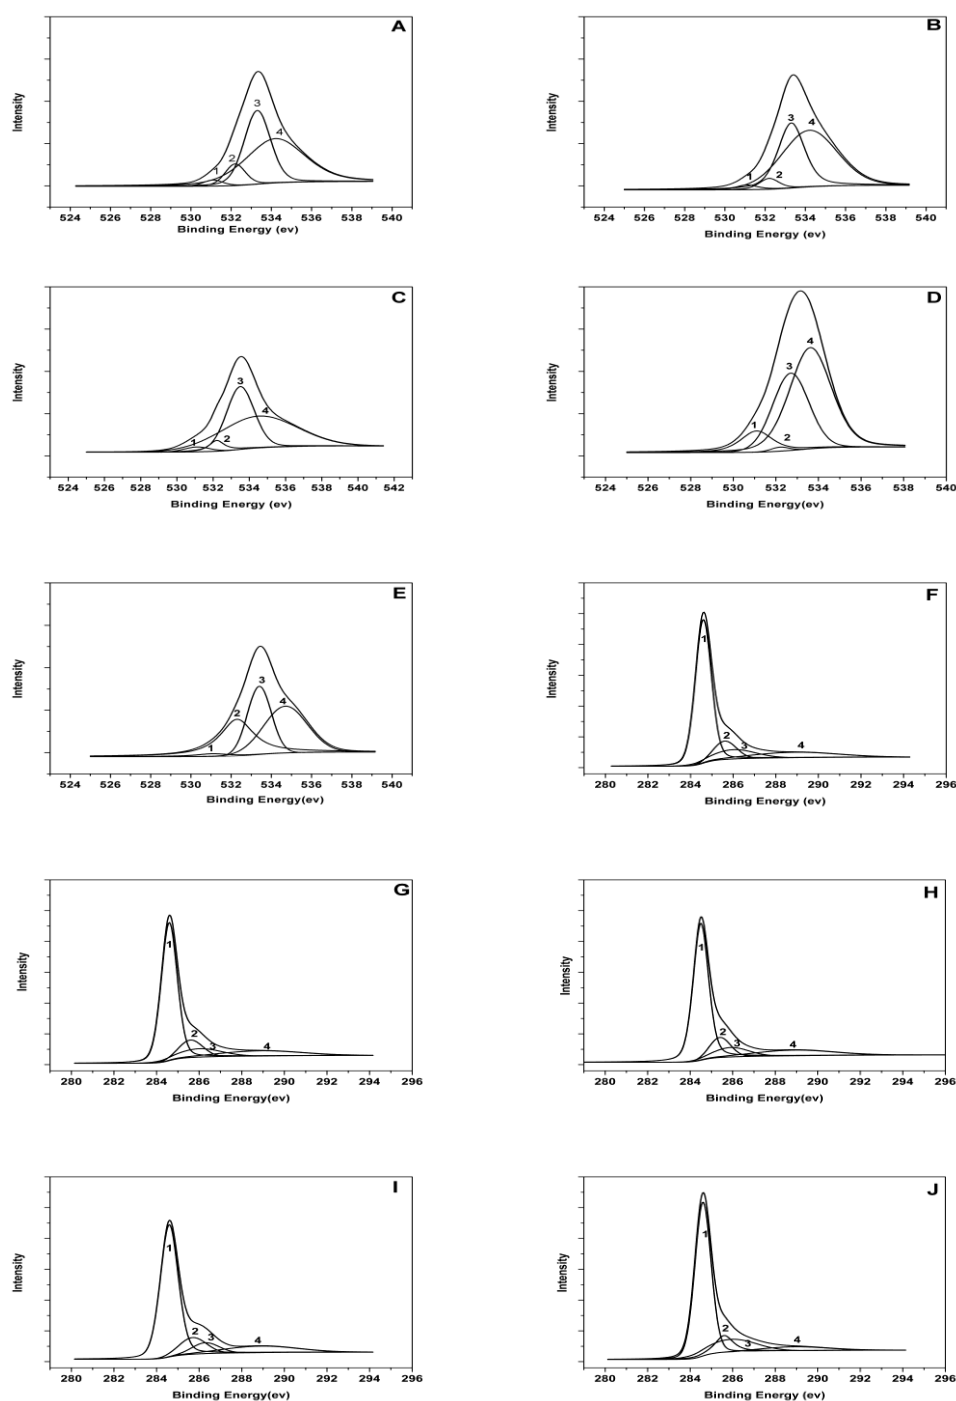

**Figure S3** High-resolution XPS O 1s spectra of the samples with different treatment(A:UR-C; B: R-C; C: UC-5Pt/C; D: UR-5Pt/C; E: 5Pt/C). High-resolution XPS C1s spectra of the samples with different treatment (F: UR-C; G: R-C; H: UC-5Pt/C; I: UR-5Pt/C; J: 5Pt/C). Deconvolution of the O 1s species gave four peaks with different binding energies of 531.1, 532.2, 533.3 and 534.2 eV, could be assigned to carbonyl oxygen, phenol oxygen, lactonic oxygen and carboxylic acid oxygen, respectively<sup>S1-S4</sup>. The deconvoluted peaks of C 1s species at the binding energies of 284.5, 285.6, 286.0 and 288.9 eV, respectively, were ascribed to graphite carbon and the contaminant carbon, carbonyl carbon, phenol carbon and carboxylic or lactonic carbon<sup>S5-S8</sup>.

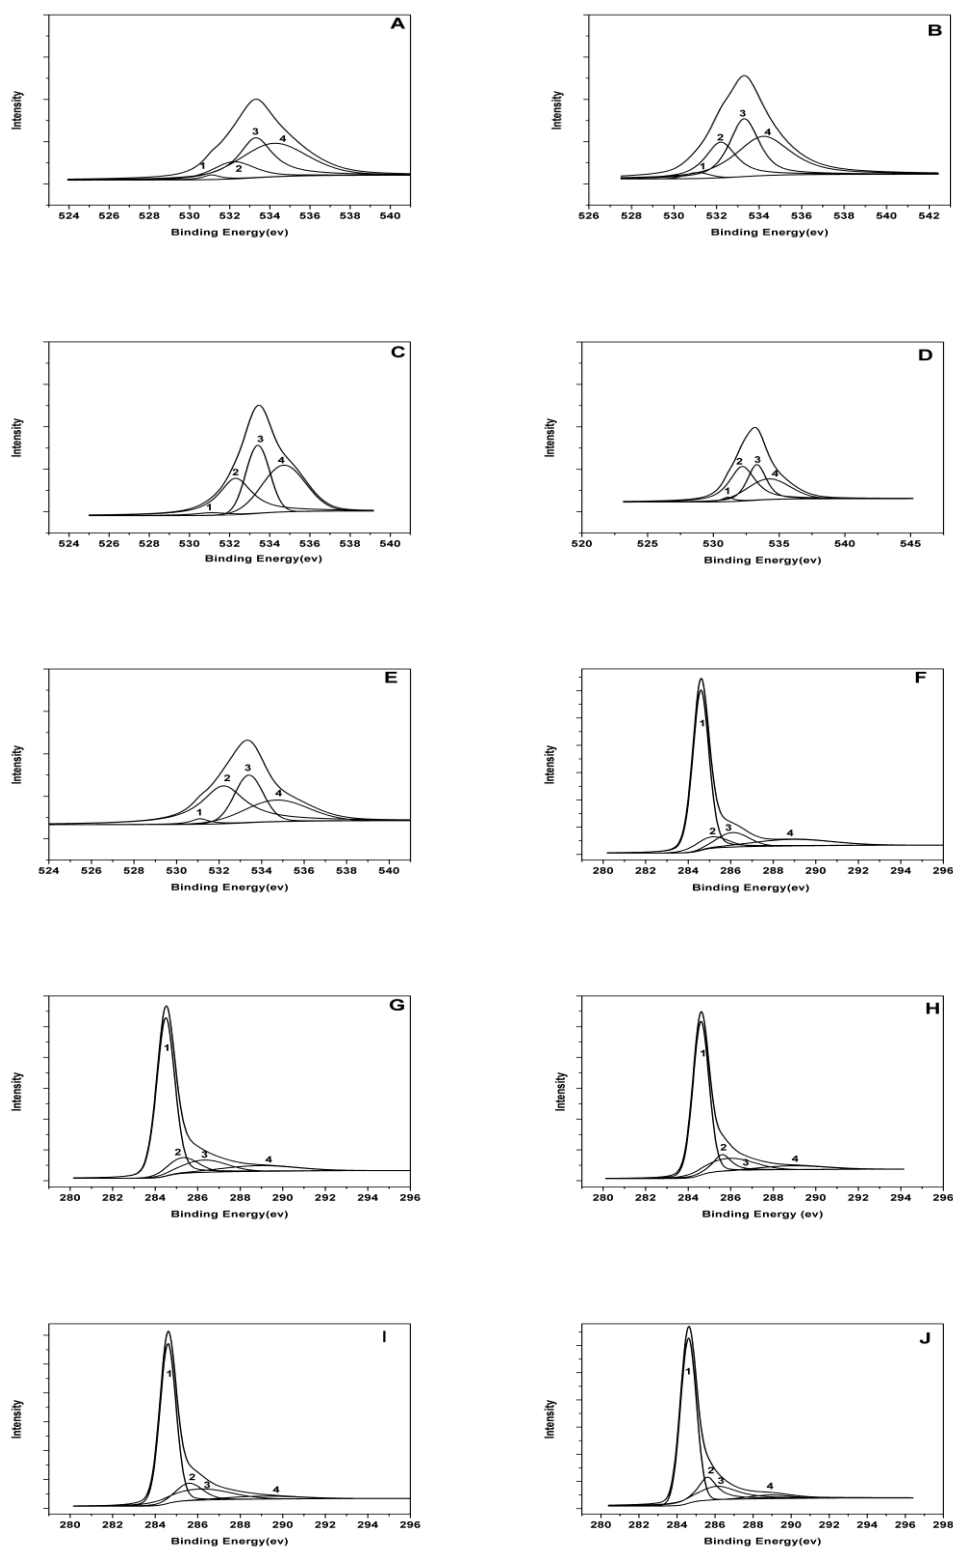

**Figure S4** High-resolution XPS O 1s spectra of different samples with Pt loaded on activated carbon after hydrogen treatment (A: 0.5 Pt/C; B: 3Pt/C; C: 5Pt/C; D: 7Pt/C; E: 11Pt/C). High-resolution XPS C1s spectra of different samples with Pt loaded on activated carbon after hydrogen treatment (F: 0.5 Pt/C; G: 3Pt/C; H: 5Pt/C; I: 7Pt/C; J: 11Pt/C).

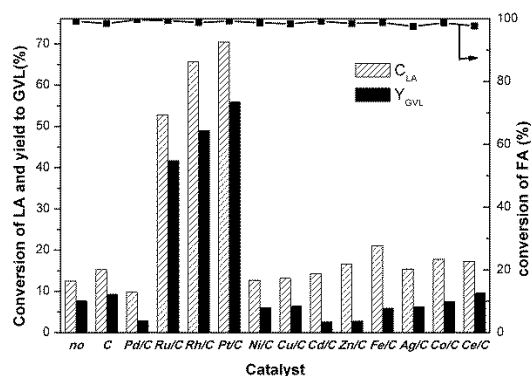

**Figure S5** The effect of different metals loaded on activated carbon on the conversion of LA to GVL at 260 °C for 2 h (The catalysts were prepared by impregnation method. The same preparation method and metal loading (5 wt%) were used for all catalysts. )

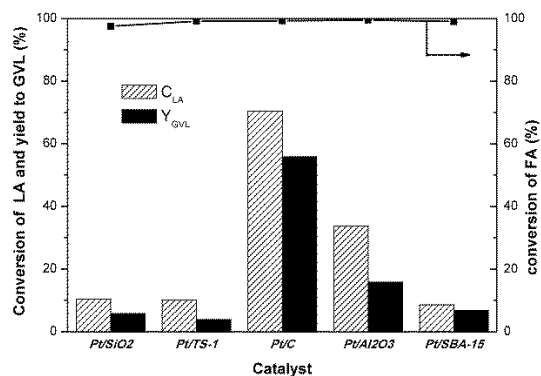

**Figure S6** The effect of several typical supports with platinum loaded on the conversion of LA to GVL at 260 °C for 2 h (The catalysts were prepared by impregnation method. The same preparation method and metal loading (5 wt%) were used for all catalysts. )

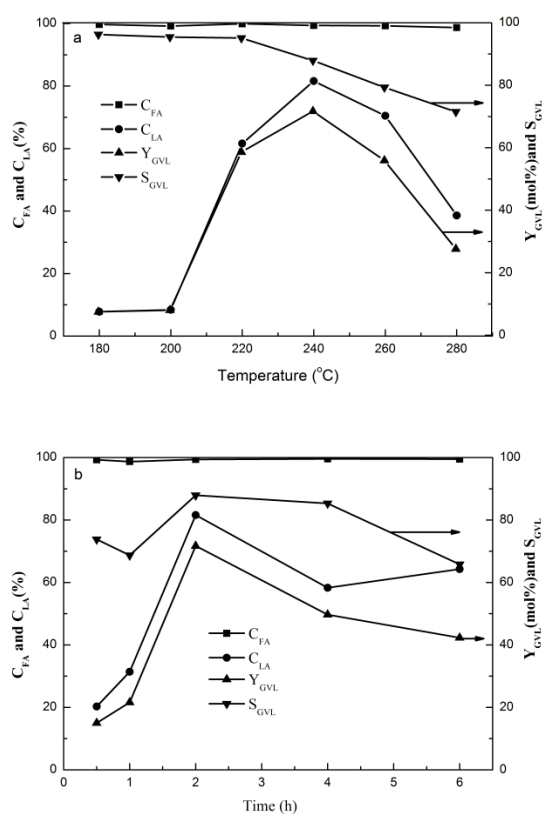

**Figure S7** Influence of reaction temperature for 2 h (a) and reaction time at 240 °C (b) on the conversion of LA to GVL with FA

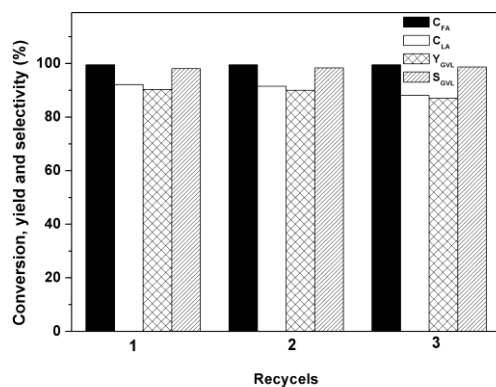

**Figure S8** The recyclability of catalysts. (Reaction conditions: LA, 11.25 mmol; FA, 33.75 mmol; H<sub>2</sub>O, 25 mL; Catalyst, 0.25 g; N<sub>2</sub>, 1MPa. 240 °C, 2 h)



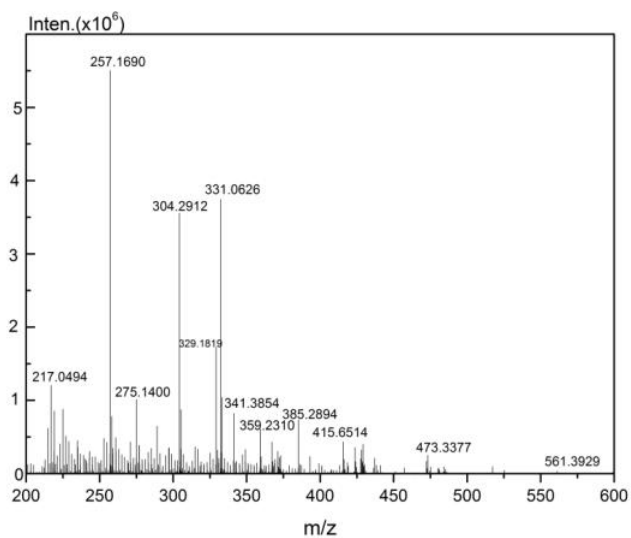

**Figure S9** ESI-MS spectra of liquid products in the filtrate obtained from the second-step

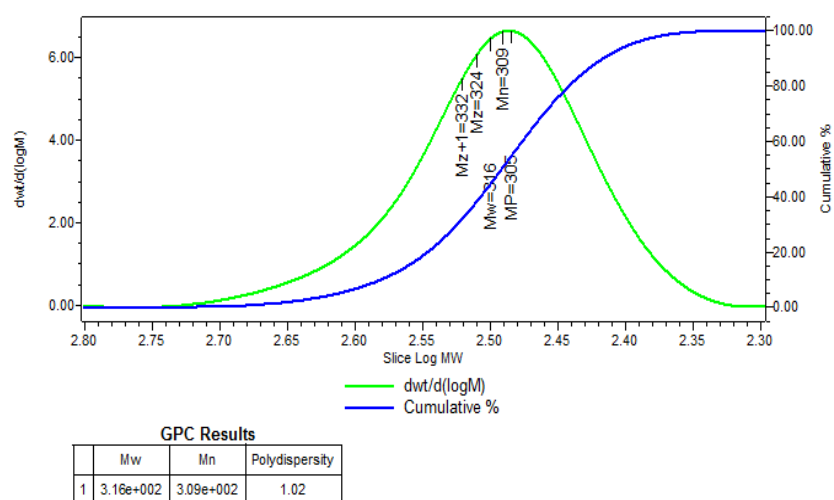

**Figure S10** GPC results of filtrate obtained from the second-step

**Table S1** The metal crystallite size for samples with different Pt loading

| samples                        | 0.5 Pt/C | 3 Pt/C | 5 Pt/C | 7 Pt/C | 11 Pt/C |
|--------------------------------|----------|--------|--------|--------|---------|
| metal crystallite size<br>(nm) | -        | 6.7    | 9.1    | 13.9   | 14.5    |

**Table S2** Conversion of LA into GVL over different catalyst with different treatment <sup>a</sup>

| Catalyst              | C <sub>FA</sub> (%) | C <sub>LA</sub> (%) | Y <sub>GVL</sub> (%) | S <sub>GVL</sub> (%) <sup>b</sup> |
|-----------------------|---------------------|---------------------|----------------------|-----------------------------------|
| UR-C <sup>c</sup>     | 96.6                | 8.0                 | 7.2                  | 89.9                              |
| R-C <sup>d</sup>      | 98.4                | 6.6                 | 5.8                  | 89.0                              |
| UC-5Pt/C <sup>e</sup> | 99.2                | 53.5                | 50.0                 | 93.5                              |
| UR-5Pt/C <sup>f</sup> | 99.0                | 53.7                | 51.6                 | 96.1                              |
| 5Pt/C <sup>g</sup>    | 99.4                | 81.6                | 71.7                 | 87.9                              |

<sup>a</sup> Reaction conditions: LA, 11.25 mmol; FA, 11.25 mmol; H<sub>2</sub>O, 25 mL; Catalyst, 0.25 g; N<sub>2</sub>, 1MPa; T=240 °C for 2 h.

<sup>b</sup> GVL selectivity based on LA conversion. <sup>c</sup> Carbon support was dried overnight at 80 °C. <sup>d</sup> Carbon support was reduced with H<sub>2</sub> at 450 °C for 2 h. <sup>e</sup> Carbon support impregnated with aqueous liquid of H<sub>2</sub>PtCl<sub>6</sub>·6H<sub>2</sub>O to obtain the catalyst. <sup>f</sup> The catalyst obtained from e was calcined with N<sub>2</sub> at 500 °C for 4 h. <sup>g</sup> The catalyst obtained from f was reduced with H<sub>2</sub> at 450 °C for 2 h.

**Table S3** The relative concentration of different surface oxygen species after deconvolution on activated carbon samples with different Pt loaded after hydrogen treatment

| Samples | Binding Energy/eV and the corresponding composition/% |       |       |       |
|---------|-------------------------------------------------------|-------|-------|-------|
|         | 531.1                                                 | 532.2 | 533.3 | 534.2 |
| 0.5Pt/C | 2.1                                                   | 15.8  | 36.5  | 45.6  |
| 3Pt/C   | 2.1                                                   | 22.7  | 33.0  | 42.2  |
| 5Pt/C   | 2.4                                                   | 32.1  | 29.1  | 36.4  |
| 7Pt/C   | 2.4                                                   | 40.4  | 27.9  | 29.3  |
| 11Pt/C  | 2.6                                                   | 46.1  | 26.3  | 25.0  |

**Table S4** The relative concentration of different surface carbon species after deconvolution on activated carbon samples with different Pt loaded after hydrogen treatment

| Samples | Binding Energy/eV and the corresponding composition/% |                        |            |            |
|---------|-------------------------------------------------------|------------------------|------------|------------|
|         | 284.6                                                 | 285.6                  | 286.1      | 288.9      |
| 0.5Pt/C | 68.1                                                  | 8.8(27.6) <sup>a</sup> | 11.0(34.5) | 12.1(37.9) |
| 3Pt/C   | 68.3                                                  | 10.5(33.1)             | 12.1(38.2) | 9.1(28.7)  |
| 5Pt/C   | 66.8                                                  | 10.6(32.0)             | 15.9(48.0) | 6.6(20.0)  |
| 7Pt/C   | 65.1                                                  | 12.8(36.8)             | 16.7(48.0) | 5.3(15.2)  |
| 11Pt/C  | 62.7                                                  | 15.7(42.2)             | 18.0(48.4) | 3.5(9.4)   |

<sup>a</sup>The values in parentheses were obtained by renormalization of the three species (phenol carbon, lactonic carbon, and carboxylic carbon).

**Table S5** The decomposition of FA and gas product distribution over different catalysts

| Catalyst | Conditions  | C <sub>FA</sub> (%) | H <sub>2</sub> (%) | CO <sub>2</sub> (%) | CO (%) | CH <sub>4</sub> (%) |
|----------|-------------|---------------------|--------------------|---------------------|--------|---------------------|
| NO       | 160 °C, 2 h | 14.4                | 49.7               | 50.3                | -      | -                   |
| NO       | 240 °C, 2 h | 99.7                | 68.1               | 28.2                | 3.6    | -                   |
| C        | 160 °C, 2 h | 14.0                | 27.5               | 64.2                | -      | 8.4                 |
| Pt/C     | 160 °C, 2 h | 95.9                | 41.5               | 53.0                | -      | 5.5                 |
| Pt/C     | 240 °C, 2 h | 99.9                | 63.7               | 30.8                | 0.4    | 5.3                 |

**Table S6** The conversion of LA with H<sub>2</sub> at 240 °C for 2 h

| Catalyst | H <sub>2</sub> (MPa) | C <sub>LA</sub> (%) | Y <sub>GVL</sub> (%) <sup>a</sup> | S <sub>GVL</sub> (%) <sup>b</sup> |
|----------|----------------------|---------------------|-----------------------------------|-----------------------------------|
| no       | 0.5                  | 15.0                | 0.1                               | 0.8                               |
| Pt/C     | 0.5                  | 39.5                | 6.3                               | 16.0                              |

<sup>a</sup> The yield of GVL was calculated through the molar amount of GVL divided by the initial molar amount of LA.

<sup>b</sup> GVL selectivity based on LA conversion.



**Table S7** The relative intensity of lattice plane in face-centered cubic structure of Pt for samples with different Pt loading

| Relative intensity<br>(%) | 0.5 Pt/C | 3 Pt/C | 5 Pt/C | 7 Pt/C | 11 Pt/C |
|---------------------------|----------|--------|--------|--------|---------|
| (111)                     | -        | 54.6   | 55.8   | 55.8   | 56.5    |
| (200)                     | -        | 26.0   | 23.7   | 26.4   | 25.8    |
| (220)                     | -        | 19.4   | 20.5   | 17.8   | 17.7    |

**Table S8** The effect of  $\text{AlCl}_3$  on the conversion of LA with FA to GVL at 240 °C for 2 h

| Samples | $\text{AlCl}_3$ | $\text{Y}_{\text{GVL}}(\%)$ |
|---------|-----------------|-----------------------------|
| fufural | -               | 1.3                         |
| fufural | +               | 1.6                         |
| LA      | -               | 71.7                        |
| LA      | +               | 67.7                        |

## REFERENCES

- [S1] U. Zielke, K. J. Huttinger and W. P. Hoffman, *Carbon*, 1996, **34**, 983.
- [S2] C. M. Castilla, M. V. L. Ramon and F. C. Marin, *Carbon*, 2000, **38**, 1995.
- [S3] J. Ye, J. Liu, Y. Zhou, Z. Zou, J. Gu and T. Yu, *J. Power. Sources*, 2009, **194**, 683
- [S4] J. L. Gomez de la Fuetnte, M. V. M. Huerta, S. Rojas, P. Terreros, J. L. G. Fierro and M. A. Pena, *Catal. Today*, 2006, **116**, 422.
- [S5] Y. K. Zhong, G. Y. Li, L. F. Zhu, Y. Yan, G. Wu and C. W. Hu, *J. Mol. Catal. A: Chem*, 2007, **272**, 169.
- [S6] V. Alderucci, L. Pino, P. L. Antonucci, W. Roh, J. Cho, H. Kim and D. L. Cocke, *Mater. chem. Phys.* 1995, **41**, 9.
- [S7] P. Albers, K. Deller, B. M. Despeyroux, A. Schafer and K. Seibold, *J. Catal.* 1992, **133**, 467.
- [S8] J. Q. Xu, C. H. Chen, M. M. Jin, G. Y. Li and C.W. Hu, *J. Chem. Phys.* 2011, **24**, 358.
